# Supplementary material
Source: MDPI journal article supplement (https://www.mdpi.com/2227-9717/12/1/174)
Supplement: s1 [file s1 › processes-2809621-supplementary.pdf]

Table S1. Definitions of score notes in the radish sprouts evaluation survey

| Characteristic quality                           | Point notes description                                             |                                                        |                                                                          |                                                                                          |                                                                                                                  |
|--------------------------------------------------|---------------------------------------------------------------------|--------------------------------------------------------|--------------------------------------------------------------------------|------------------------------------------------------------------------------------------|------------------------------------------------------------------------------------------------------------------|
|                                                  | 5                                                                   | 4                                                      | 3                                                                        | 2                                                                                        | 1                                                                                                                |
| Appearance<br>(uniformity of sprout size/length) | very uniform                                                        | uniform, weak noticeable deviations                    | on average differential                                                  | clearly varied, noticeable deviations                                                    | very varied                                                                                                      |
| Colour                                           | vivid green for leaves, white root                                  | green for leaves, white, white-red root                | green-yellow for leaves, red root                                        | yellow-greenish or brown, with discolouration of leaves, yellowish-red, yellow root      | yellow, very brown, gray, with spots, discolouration of the cotyledons, yellowish red, yellow or brown root      |
| Aroma (intensity and type)                       | very intense, fresh, clean, fully characteristic for radish sprouts | intense, noticeable, characteristic for radish sprouts | moderately perceptible, poor, average, characteristic for radish sprouts | poorly palpable, changed, unusual,                                                       | intense but very unusual, strongly changed, unusual, stale, foreign, chemical                                    |
| Texture                                          | very firm, crispy, juicy, even                                      | quite firm, quite juicy, quite crispy, quite even      | medium crispy                                                            | soft, not very firm, sticky, dry                                                         | pasty, very soft, very sticky, very dry, completely changed                                                      |
| Taste (intensity and type)                       | very intense, strongly noticeable, very typical for radish sprouts  | intense, noticeable, typical for radish sprouts        | moderately noticeable, quite typical for radish sprouts                  | barely perceptible, unusual for radish sprouts, slight foreign aftertaste, e.g. chemical | intense, but very unusual for radish sprouts, distinct foreign aftertaste, e.g. sour, bitter, chemical, metallic |

Table S2. Definitions of score notes in the broccoli sprout evaluation survey

| Characteristic quality                           | Point notes description                                               |                                                          |                                                                            |                                                                                             |                                                                                                                     |
|--------------------------------------------------|-----------------------------------------------------------------------|----------------------------------------------------------|----------------------------------------------------------------------------|---------------------------------------------------------------------------------------------|---------------------------------------------------------------------------------------------------------------------|
|                                                  | 5                                                                     | 4                                                        | 3                                                                          | 2                                                                                           | 1                                                                                                                   |
| Appearance<br>(uniformity of sprout size/length) | very uniform                                                          | uniform , weak noticeable deviations                     | on average differential                                                    | clearly varied, noticeable deviations                                                       | very varied                                                                                                         |
| Colour                                           | vivid green for leaves, white root,                                   | green for leaves, white, white-yellow root               | green-yellow for the leaves, yellow for the root                           | yellow-greenish or brown, with discolouration of leaves, yellow root                        | yellow, very brown, gray, with spots, discolouration of the cotyledons, yellow or brown root                        |
| Aroma (intensity and type)                       | very intense, fresh, clean, fully characteristic for broccoli sprouts | intense, noticeable, characteristic for broccoli sprouts | moderately perceptible, poor, average, characteristic for broccoli sprouts | poorly palpable , changed , unusual ,                                                       | intense but very unusual, strongly changed, unusual, stale, foreign, chemical                                       |
| Texture                                          | very firm, crispy, juicy, even                                        | quite firm, quite juicy, quite crispy, quite even        | medium crispy                                                              | soft, not very firm, sticky, dry                                                            | pasty , very soft, very sticky, very dry, completely changed                                                        |
| Taste (intensity and type)                       | very intense, strongly noticeable, very typical for broccoli sprouts  | intense, noticeable, typical for broccoli sprouts        | moderately noticeable, quite typical for broccoli sprouts                  | barely perceptible, unusual for broccoli sprouts , slight foreign aftertaste, e.g. chemical | intense, but very unusual for broccoli sprouts , distinct foreign aftertaste, e.g. sour, bitter, chemical, metallic |
